# Supplementary material for: Human pericentromeric tandemly repeated DNA is transcribed at the end of oocyte maturation and is associated with membraneless mitochondria-associated structures
Source: PubMed Central journal article supplement (PMC7665179; doi:10.1038/s41598-020-76628-8), 2020-11-12
Supplement: 41598_2020_76628_MOESM1_ESM.pdf [file 41598_2020_76628_MOESM1_ESM.pdf]

**Supplementary information for**

**Human pericentromeric tandemly repeated DNA is transcribed at the end of oocyte maturation and is associated with membraneless mitochondria-associated structures**

**Dobrynin M.A.<sup>1</sup>, Korchagina N.M.<sup>2,4</sup>, Prjibelski A.D.<sup>3</sup>, Shafranskaya D.<sup>3</sup>, Ostromyshensky D.I.<sup>1</sup>  
Shunkina K.<sup>2</sup>, Stepanova I.<sup>1</sup>, Kotova A.V.<sup>1,5</sup>, Podgornaya O.I.<sup>1,4</sup>, Eukashvily N.I.<sup>1,5\*</sup>**

<sup>1</sup>. Institute of Cytology RAS

<sup>2</sup>. Ava-Peter – Scandinavia Assisted Reproductive Technology Clinic

<sup>3</sup>. Center for Algorithmic Biotechnology, St. Petersburg State University

<sup>4</sup> Faculty of Biology, St. Petersburg State University

<sup>5</sup>. North-Western State Medical University named after I.I. Mechnikov

\* - n.enukashvily@incras.ru

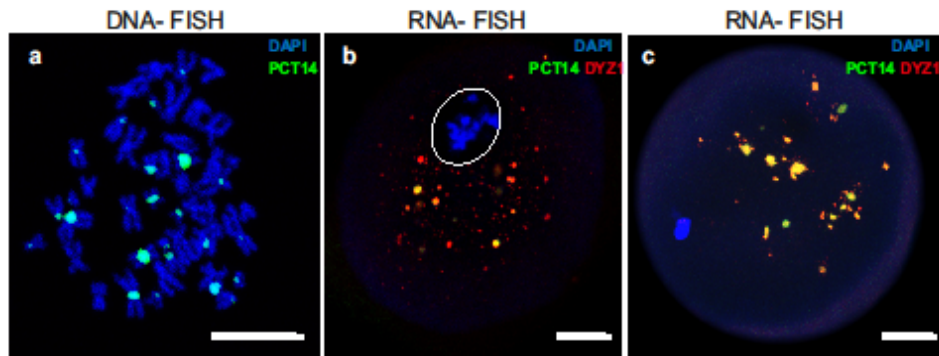

Supplementary Fig. S1. . Spatial distribution of PCT14 DNA (a) and RNA (b-c) relative to DYZ1 RNA (b-c). The DYZ1 probe is basically an “ATTCC” repeat, while PCT14 is based on GGAAT repeat. . (a) Localization of HS2/HS3 DNA probed with PCT14 (green) in metaphase spreads of human lymphocytes. RNA-FISH with two probes (DYZ1, red, and PCT14, green) was carried out in order to study, whether the HS2/3 transcription is strain-specific in human GV (b) and MI (c) oocytes. The nucleus in (b) was encircled with dotted white line after the merge with brightfield data (not included in the panel) Chromatin was counterstained with DAPI (blue). Scale bars: (5  $\mu\text{m}$ ) (a) and (20  $\mu\text{m}$ ) (b,c).

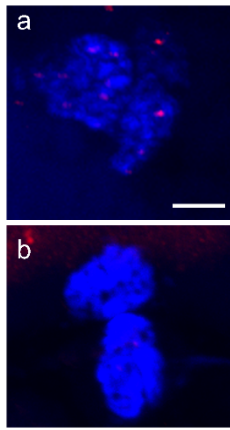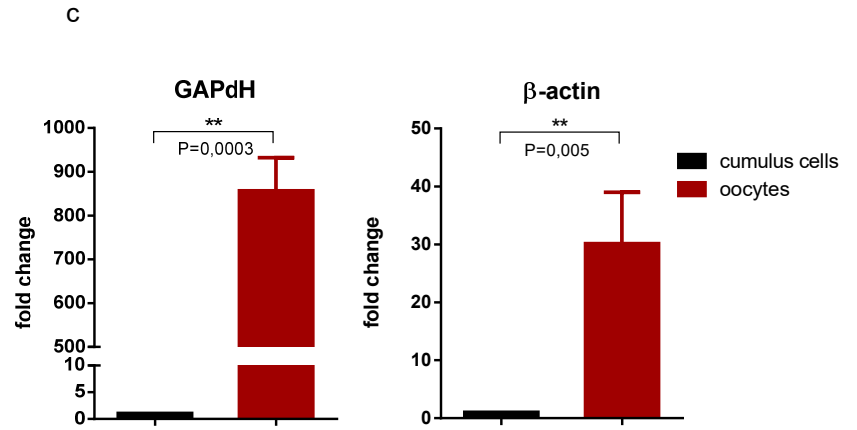

Supplementary Fig. S2. Relative expression of HS2/HS3 in human oocytes and cumulus cells. Cumulus cells express little (a) or no (b) HS2/HS3 transcripts as shown by RNA-FISH with the DYZ1 probe (red). The real-time PCR data were calculated by the  $2^{-\Delta\Delta Ct}$  method with the levels of gene expression normalized to the two genes: GAPdH or  $\beta$ -actin (c). Y-axis: fold change (mean  $\pm$  SD) between cumulus cells (obtained from 5 donors) and oocytes (obtained from 7 donors, total n=60). \*\* -  $p < 0.01$ , t-test. Nuclei in (a, b) were counterstained with DAPI. Scale bar: 50  $\mu$ m.

*Supplementary Table 1. Quantification (in Transcripts Per Million, TPM) of HS2/HS3 transcription in published oocyte transcriptomes*

| Publication              | Reyes et al., 2017 (6 of 20 transcriptomes) |                  |                 |                  |                  |                 | Zhang et al., 2018 | Ferrero et al., 2019 |                 |                  |
|--------------------------|---------------------------------------------|------------------|-----------------|------------------|------------------|-----------------|--------------------|----------------------|-----------------|------------------|
| Sample ID (SRR No)       | 5295892                                     | 5295900          | 5295904         | 5295893          | 5295901          | 5295905         | 6350575            | 8446791              | 8446800         | 8446805          |
| Stage                    | GV                                          | GV               | GV              | MII              | MII              | MII             | Preovulatory       | MII                  | MII             | MII              |
| Donor age                | 29                                          | 20               | 42              | 29               | 20               | 42              | N/A                | 24                   | 18              | 27               |
| Total clusters' TPM      | <b>2,61721</b>                              | <b>16,950211</b> | <b>2,440013</b> | <b>12,680011</b> | <b>84,924001</b> | <b>6,582101</b> | <b>13,00845</b>    | <b>4,712133</b>      | <b>8,850269</b> | <b>14,167788</b> |
| Total References sum TPM | <b>0,89045</b>                              | <b>3,03511</b>   | <b>0,631223</b> | <b>5,886452</b>  | <b>34,79495</b>  | <b>2,411017</b> | <b>12,047245</b>   | <b>1,080532</b>      | <b>2,37208</b>  | <b>3,64405</b>   |
| ACTB                     | 152,431                                     | 243,856          | 189,985         | 172,468          | 364,043          | 245,628         | 4416,17            | 46,9432              | 33,9912         | 50,3112          |
| HBA1                     | <b>0</b>                                    | <b>0</b>         | <b>0</b>        | <b>0</b>         | <b>0</b>         | <b>0</b>        | <b>0</b>           | <b>0</b>             | <b>0</b>        | <b>0</b>         |

Total clusters' TPM —TPM of representative consensus sequences that were computed for each of seven clusters

Total References sum TPM — total TPM of three already known HS2/HS3 sequences: X60726.1, S90110.1, X82942.1. The already known sequences were taken as references for quantification. In all the reassembled transcriptomes, they comprise 20-25% of all transcripts revealed.

ACTB — $\beta$ -actin TPM. HBA1 — hemoglobin subunit alpha 1 TPM

*Supplementary Table 2. HS2/HS3 TPM in GV and MII oocytes transcriptomes published by Reyes et al. (2017)*

| Donor age | Patient ID | HS2/HS3 clusters' TPM |           |        |          |
|-----------|------------|-----------------------|-----------|--------|----------|
|           |            | GV (TPM)              | MII (TPM) | GV (%) | MII (%)  |
| 40        | AMA-1      | 10,79                 | 8,86      | 100    | 82,14993 |
| 43        | AMA-2      | 3,14                  | 8,35      | 100    | 266,219  |
| 40        | AMA-3      | 6,20                  | 43,36     | 100    | 699,2973 |
| 42        | AMA-4      | 2,44                  | 6,58      | 100    | 269,5454 |
| 43        | AMA-5      | 174,43                | 322,78    | 100    | 185,0472 |
| 27        | YNG-1      | 8,53                  | 75,38     | 100    | 883,7673 |
| 29        | YNG-2      | 18,32                 | 10,63     | 100    | 58,02074 |
| 29        | YNG-3      | 2,17                  | 12,68     | 100    | 585,5544 |
| 29        | YNG-4      | 5,85                  | 2,19      | 100    | 37,40918 |
| 20        | YNG-5      | 16,95                 | 84,72     | 100    | 499,7394 |



a.

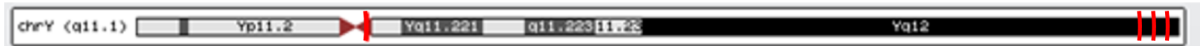

b.

| Description                                                            | Max Score | Total Score | Query Cover | E value | Per. Ident | Accession                    |
|------------------------------------------------------------------------|-----------|-------------|-------------|---------|------------|------------------------------|
| <a href="#">Homo sapiens chromosome 1 GRCh38.p12 Primary Assembly</a>  | 87.8      | 94938       | 100%        | 3e-16   | 100.00%    | <a href="#">NC_000001.11</a> |
| <a href="#">Homo sapiens chromosome 2 GRCh38.p12 Primary Assembly</a>  | 87.8      | 2.132e+05   | 100%        | 3e-16   | 100.00%    | <a href="#">NC_000002.12</a> |
| <a href="#">Homo sapiens chromosome 4 GRCh38.p12 Primary Assembly</a>  | 87.8      | 6.457e+05   | 100%        | 3e-16   | 100.00%    | <a href="#">NC_000004.12</a> |
| <a href="#">Homo sapiens chromosome 5 GRCh38.p12 Primary Assembly</a>  | 87.8      | 60287       | 100%        | 3e-16   | 100.00%    | <a href="#">NC_000005.10</a> |
| <a href="#">Homo sapiens chromosome 8 GRCh38.p12 Primary Assembly</a>  | 87.8      | 2723        | 100%        | 3e-16   | 100.00%    | <a href="#">NC_000008.11</a> |
| <a href="#">Homo sapiens chromosome 9 GRCh38.p12 Primary Assembly</a>  | 87.8      | 8401        | 100%        | 3e-16   | 100.00%    | <a href="#">NC_000009.12</a> |
| <a href="#">Homo sapiens chromosome 10 GRCh38.p12 Primary Assembly</a> | 87.8      | 1.747e+06   | 100%        | 3e-16   | 100.00%    | <a href="#">NC_000010.11</a> |
| <a href="#">Homo sapiens chromosome 12 GRCh38.p12 Primary Assembly</a> | 87.8      | 6429        | 100%        | 3e-16   | 100.00%    | <a href="#">NC_000012.12</a> |
| <a href="#">Homo sapiens chromosome 14 GRCh38.p12 Primary Assembly</a> | 87.8      | 46590       | 100%        | 3e-16   | 100.00%    | <a href="#">NC_000014.9</a>  |
| <a href="#">Homo sapiens chromosome 15 GRCh38.p12 Primary Assembly</a> | 87.8      | 19454       | 100%        | 3e-16   | 100.00%    | <a href="#">NC_000015.10</a> |
| <a href="#">Homo sapiens chromosome 16 GRCh38.p12 Primary Assembly</a> | 87.8      | 94962       | 100%        | 3e-16   | 100.00%    | <a href="#">NC_000016.10</a> |
| <a href="#">Homo sapiens chromosome 17 GRCh38.p12 Primary Assembly</a> | 87.8      | 1.472e+06   | 100%        | 3e-16   | 100.00%    | <a href="#">NC_000017.11</a> |
| <a href="#">Homo sapiens chromosome 20 GRCh38.p12 Primary Assembly</a> | 87.8      | 9.320e+05   | 100%        | 3e-16   | 100.00%    | <a href="#">NC_000020.11</a> |
| <a href="#">Homo sapiens chromosome 21 GRCh38.p12 Primary Assembly</a> | 87.8      | 7.937e+05   | 100%        | 3e-16   | 100.00%    | <a href="#">NC_000021.9</a>  |
| <a href="#">Homo sapiens chromosome 22 GRCh38.p12 Primary Assembly</a> | 87.8      | 2.613e+05   | 100%        | 3e-16   | 100.00%    | <a href="#">NC_000022.11</a> |
| <a href="#">Homo sapiens chromosome Y GRCh38.p12 Primary Assembly</a>  | 87.8      | 2.183e+06   | 100%        | 3e-16   | 100.00%    | <a href="#">NC_000024.10</a> |

Supplementary Fig. S4. The DYZ1 probe in the human genome. (a) Localization of the DYZ1 sequence (red lines) according to the UCSC Genome Browser program in the array of pericentromeric and long arm HS arrays of the Y chromosome (GRCh37/hg19 Assembly); (b) The representative fragment of DYZ1 alignment against the human reference genome (taxID: 9606) using BLAST software
